# Supplementary material for: Hematotoxicity and Nephrotoxicity in Prostate Cancer Patients Undergoing Radioligand Therapy with [177Lu]Lu-PSMA I&T
Source: MDPI journal article supplement (doi:10.3390/cancers14030647), 2022-01-27
Supplement: s1 [file s1]

Table S1: Distribution of patients in the extended cohort ( $n=17$ ) in the different CTCAE groups for renal toxicity and distribution of the patients according to KDIGO.

|                             |              | Baseline | %    | After one<br>cycle | %    | After two<br>cycles | %    | After three<br>cycles | %    | After four<br>cycles | %    | After five<br>cycles | %    |
|-----------------------------|--------------|----------|------|--------------------|------|---------------------|------|-----------------------|------|----------------------|------|----------------------|------|
| <b>CTCAE<br/>Creatinine</b> | CTC 0°       | 14       | 82.4 | 15                 | 88.2 | 14                  | 82.4 | 14                    | 82.4 | 13                   | 76.5 | 12                   | 70.6 |
|                             | CTC I°       | 2        | 11.8 | 2                  | 11.8 | 3                   | 17.6 | 3                     | 17.6 | 3                    | 17.6 | 4                    | 23.5 |
|                             | CTC II°      | 1        | 5.9  | 0                  | 0.0  | 0                   | 0.0  | 0                     | 0.0  | 1                    | 5.9  | 1                    | 5.9  |
|                             | CTC III°/IV° | 0        | 0.0  | 0                  | 0.0  | 0                   | 0.0  | 0                     | 0.0  | 0                    | 0.0  | 0                    | 0.0  |
| <b>CTCAE<br/>eGFR</b>       | CTC 0°       | 4        | 23.5 | 4                  | 23.5 | 5                   | 29.4 | 5                     | 29.4 | 4                    | 23.5 | 5                    | 29.4 |
|                             | CTC I°       | 10       | 58.8 | 11                 | 64.7 | 9                   | 52.9 | 8                     | 47.1 | 10                   | 58.8 | 9                    | 52.9 |
|                             | CTC II°      | 3        | 17.6 | 2                  | 11.8 | 3                   | 17.6 | 4                     | 23.5 | 3                    | 17.6 | 3                    | 17.6 |
|                             | CTC III°/IV° | 0        | 0.0  | 0                  | 0.0  | 0                   | 0.0  | 0                     | 0.0  | 0                    | 0.0  | 0                    | 0.0  |
| <b>KDIGO</b>                | G1           | 4        | 23.5 | 4                  | 23.5 | 5                   | 29.4 | 5                     | 29.4 | 4                    | 23.5 | 5                    | 29.4 |
|                             | G2           | 10       | 58.8 | 11                 | 64.7 | 9                   | 52.9 | 8                     | 47.1 | 10                   | 58.8 | 9                    | 52.9 |
|                             | G3a          | 2        | 11.8 | 2                  | 11.8 | 2                   | 11.8 | 3                     | 17.6 | 1                    | 5.9  | 0                    | 0.0  |
|                             | G3b          | 1        | 5.9  | 0                  | 0.0  | 1                   | 5.9  | 1                     | 5.9  | 2                    | 11.8 | 3                    | 17.6 |
|                             | G4           | 0        | 0.0  | 0                  | 0.0  | 0                   | 0.0  | 0                     | 0.0  | 0                    | 0.0  | 0                    | 0.0  |

Table S2: Distribution of patients in the extended cohort ( $n=17$ ) in the different CTCAE groups for hematotoxicity.

[illegible]
